# Supplementary material for: Fungistatic Activity Mediated by Volatile Organic Compounds Is Isolate-Dependent in Trichoderma sp. “atroviride B”
Source: MDPI journal article supplement (doi:10.3390/jof9020238), 2023-02-10
Supplement: s1 [file s1]

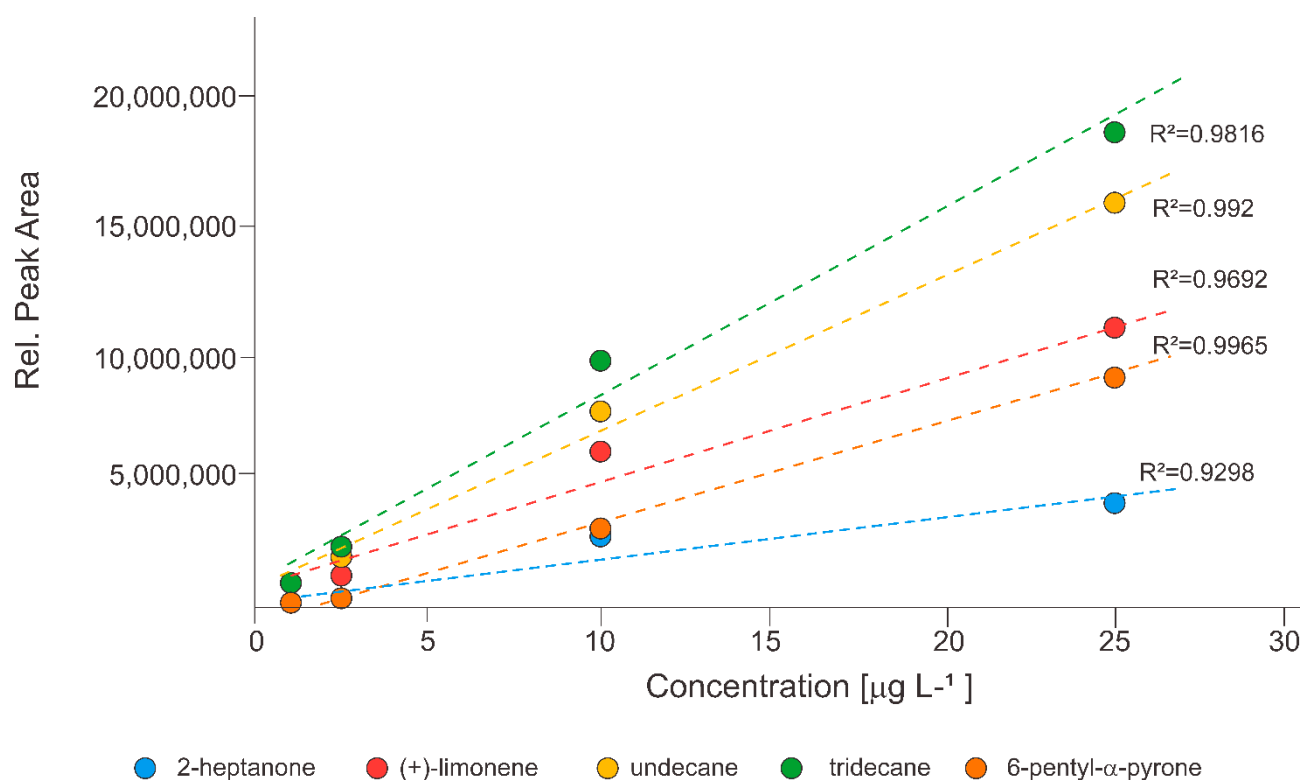

**Figure S1.** Calibration curves of 5 VOCs detected in the headspace of *Trichoderma* sp. “atroviride B” isolates. Mixture of the 5 VOCs were added to 20 mL SPME glass vials in four concentrations (1, 2.5, 10, 25  $\mu\text{g L}^{-1}$ ) and analysed with four technical replicates by GC-MS.
